# Supplementary material for: Phyto-Beneficial Traits of Rhizosphere Bacteria: In Vitro Exploration of Plant Growth Promoting and Phytopathogen Biocontrol Ability of Selected Strains Isolated from Harsh Environments
Source: MDPI journal article supplement (doi:10.3390/plants11020230), 2022-01-17
Supplement: s1 [file s1]

## Supplementary Materials

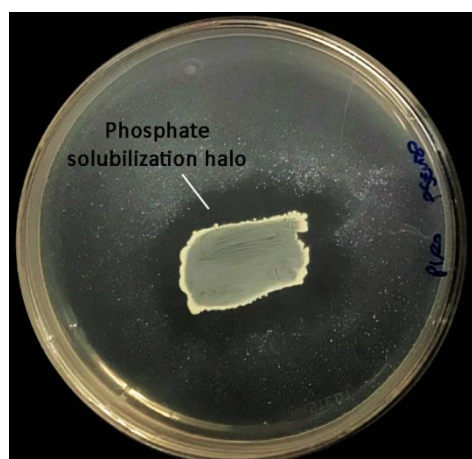

**Figure S1.** Phosphate solubilization assay. Example of PHA\_1 positive solubilization halo surrounding the bacterial colony.

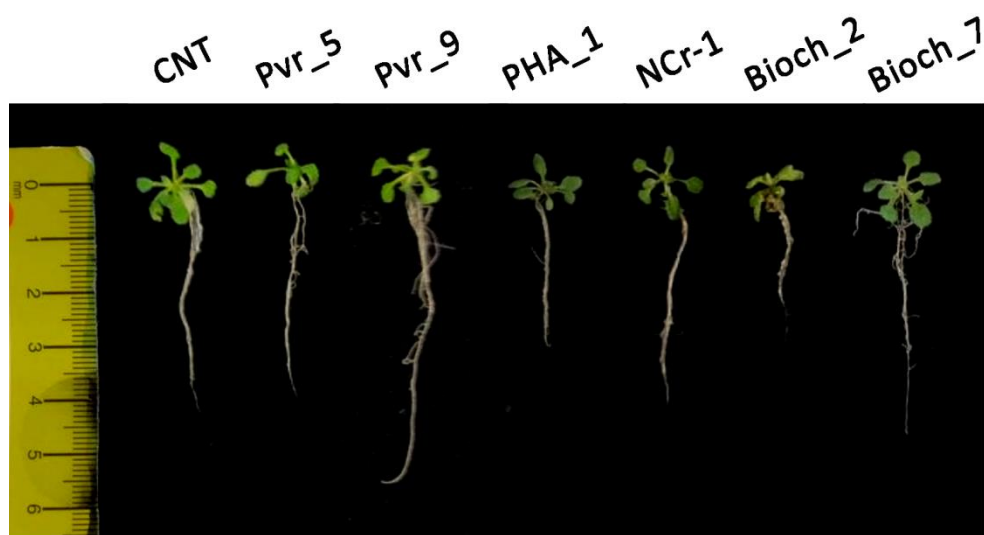

**Figure S2.** Primary root elongation. Examples of *A. thaliana* 14-days-old seedlings after single bacterial strains inoculation on seeds.
